# Supplementary material for: Investigation of kinetics and adsorption isotherm for fluoride removal from aqueous solutions using mesoporous cerium–aluminum binary oxide nanomaterials
Source: Royal Society of Chemistry journal article supplement (doi:10.1039/d1ra00598g), 2021-01-01
Supplement: d1ra00598g1.pdf [file d1ra00598g1.pdf]

## **Supporting Information**

### **Investigating kinetics and adsorption isotherm study for fluoride removal from aqueous solution by mesoporous Cerium-Aluminum Binary Oxide Nanomaterials**

Rumman Zaidi,<sup>\*a</sup> Saif Ullah Khan,<sup>b</sup> I. H. Farooqi,<sup>b</sup> and Ameer Azam<sup>a</sup>

<sup>a</sup>*Department of Applied Physics, Z.H. College of Engineering & Technology, Aligarh Muslim University, Aligarh-202002, India*

<sup>b</sup>*Environmental Engineering Section, Department of Civil Engineering, Z.H. College of Engineering & Technology, Aligarh Muslim University, Aligarh-202002, India*



Table 2s. Pseudo-second order Kinetics parameters for the sorption of fluoride ions onto Ce-Al (1:3) binary oxide nanoadsorbent

| Kinetic models             | Dosage of Ce-Al Binary oxides nanoparticles |                            |                                   |                          |                            |                                 |                            |                            |                          |                                 |                                 |                                 |
|----------------------------|---------------------------------------------|----------------------------|-----------------------------------|--------------------------|----------------------------|---------------------------------|----------------------------|----------------------------|--------------------------|---------------------------------|---------------------------------|---------------------------------|
|                            | 0.1 g/l                                     |                            |                                   |                          | 0.5 g/l                    |                                 |                            |                            | 1 g/l                    |                                 |                                 |                                 |
| Pseudo-Second Order        |                                             |                            |                                   |                          |                            |                                 |                            |                            |                          |                                 |                                 |                                 |
| Linear Fitting             | Initial concentrations (mg/l)               |                            |                                   |                          |                            |                                 |                            |                            |                          |                                 |                                 |                                 |
|                            | 10                                          | 15                         | 25                                | 35                       | 10                         | 15                              | 25                         | 35                         | 10                       | 15                              | 25                              | 35                              |
| q <sub>e</sub> exp (mg/g)  | 68.9                                        | 99.9                       | 159                               | 197.9                    | 15.4                       | 24.2                            | 42.22                      | 60.42                      | 9.43                     | 13.58                           | 23.36                           | 32.9                            |
| q <sub>e</sub> cal (mg/g)  | 69.44                                       | 104.1                      | 163.9                             | 204.0                    | 15.57                      | 24.21                           | 42.19                      | 60.60                      | 9.48                     | 13.64                           | 23.36                           | 33.11                           |
| K <sub>2</sub> (g/mg/hour) | 0.5184                                      | 0.0485                     | 0.0465                            | 0.0300                   | 4.896                      | 1.312                           | 1.404                      | 3.025                      | 5.049                    | 5.372                           | 1.831                           | 1.302                           |
| R <sup>2</sup>             | 1                                           | 0.9995                     | 0.9999                            | 0.9998                   | 0.9991                     | 0.9999                          | 0.9998                     | 1                          | 1                        | 1                               | 1                               | 1                               |
| Non-linear model           |                                             |                            |                                   |                          |                            |                                 |                            |                            |                          |                                 |                                 |                                 |
| Best-fit values            |                                             |                            |                                   |                          |                            |                                 |                            |                            |                          |                                 |                                 |                                 |
| q <sub>e</sub> exp (mg/g)  | 68.9                                        | 99.9                       | 159                               | 197.9                    | 15.4                       | 24.2                            | 42.22                      | 60.42                      | 9.43                     | 13.58                           | 23.36                           | 32.9                            |
| q <sub>e</sub> cal (mg/g)  | 69.92                                       | 99.99                      | 160.25                            | 198.16                   | 15.50                      | 25.39                           | 43.01                      | 60.67                      | 9.65                     | 13.89                           | 23.52                           | 33.28                           |
| K <sub>2</sub> (g/mg/hour) | 0.40167                                     | 0.02415                    | 0.02162                           | 0.02106                  | 1.15667                    | 1.108                           | 0.29122                    | 0.20666                    | 2.4509                   | 1.9565                          | 1.8584                          | 1.0806                          |
| Std. Error                 |                                             |                            |                                   |                          |                            |                                 |                            |                            |                          |                                 |                                 |                                 |
| q <sub>e</sub> cal (mg/g)  | 0.32291                                     | 2.16266                    | 4.70601                           | 4.51167                  | 0.45979                    | 1.04311                         | 0.74891                    | 0.04547                    | 0.04637                  | 0.10272                         | 0.20072                         | 0.11796                         |
| K <sub>2</sub> (g/mg/hour) | 0.05848                                     | 0.00235                    | 0.00361                           | 0.00475                  | 0.71988                    | 1.43724                         | 4.17567                    | 0.23375                    | 0.31704                  | 0.44251                         | 3.1799                          | 0.15208                         |
| 95% Confidence Intervals   |                                             |                            |                                   |                          |                            |                                 |                            |                            |                          |                                 |                                 |                                 |
| q <sub>e</sub> cal (mg/g)  | 68.8964<br>3 to<br>70.9516<br>9             | 910.3383<br>to<br>124.1034 | 155.2744<br>2 to<br>195.2276<br>6 | 192.8047 to<br>231.52099 | 14.03688<br>to<br>16.96342 | 22.0786<br>2 to<br>28.7178<br>8 | 40.62265<br>to<br>45.38941 | 60.53242<br>to<br>60.82183 | 9.5089<br>to<br>9.80402  | 13.5638<br>9 to<br>14.2177<br>2 | 22.8907<br>1 to<br>24.1682<br>8 | 32.9114<br>7 to<br>33.6622<br>6 |
| K <sub>2</sub> (g/mg/hour) | 0.2155<br>to<br>0.58778                     | 0.01668t<br>o<br>0.03162   | 0.0101 to<br>0.0331               | 0.01193 to<br>0.0422     | 0.1343 to<br>3.44764       | 0.46594<br>to<br>5.6819         | 1.9976 to<br>15.5800       | 0.4627 to<br>2.95054       | 1.44199<br>to<br>3.45993 | 0.5482<br>to<br>3.36481         | 2.26143<br>9                    | 0.5966<br>to<br>1.56468         |
| Goodness of Fit            |                                             |                            |                                   |                          |                            |                                 |                            |                            |                          |                                 |                                 |                                 |
| Degrees of Freedom         | 3                                           | 3                          | 3                                 | 3                        | 3                          | 3                               | 3                          | 3                          | 3                        | 3                               | 3                               | 3                               |
| R <sup>2</sup>             | 0.9999                                      | 0.9995                     | 0.9988                            | 0.9991                   | 0.9979                     | 0.9959                          | 0.9993                     | 1                          | 0.9999                   | 0.9999                          | 0.9998                          | 0.9999                          |
| Residual Sum of Squares    | 0.14094                                     | 2.67027                    | 16.1114                           | 18.6471                  | 0.26887                    | 1.4710                          | 0.81987                    | 0.00305                    | 0.00285                  | 0.01421                         | 0.05874                         | 0.01926                         |
| Sy.x                       | 0.21675                                     | 0.94345                    | 2.31743                           | 2.49314                  | 0.29937                    | 0.7002                          | 0.52277                    | 0.03187                    | 0.03081                  | 0.06883                         | 0.13992                         | 0.08013                         |
| Number of points analyzed  | 5                                           | 5                          | 5                                 | 5                        | 5                          | 5                               | 5                          | 5                          | 5                        | 5                               | 5                               | 5                               |

Table 3s. Weber–Morris intraparticle diffusion kinetic parameters for the sorption of fluoride ions onto Ce-Al (1:3) binary oxide nanoadsorbent

| Kinetic models                  | Dosage of Ce-Al Binary oxides nanoparticles |        |        |        |         |        |        |        |        |        |        |        |
|---------------------------------|---------------------------------------------|--------|--------|--------|---------|--------|--------|--------|--------|--------|--------|--------|
|                                 | 0.1 g/l                                     |        |        |        | 0.5 g/l |        |        |        | 1 g/l  |        |        |        |
| Intra-particle diffusion        | Initial concentrations (mg/l)               |        |        |        |         |        |        |        |        |        |        |        |
|                                 | 10                                          | 15     | 25     | 35     | 10      | 15     | 25     | 35     | 10     | 15     | 25     | 35     |
| Kid (mg/g/hour <sup>0.5</sup> ) | 1.26                                        | 4.27   | 5.30   | 8.90   | 0.1679  | 0.2315 | 0.2544 | 0.285  | 0.2466 | 0.2897 | 0.3395 | 0.6325 |
| C (mg/g)                        | 10.67                                       | 18.80  | 25.01  | 27.55  | 13.905  | 24.314 | 42.584 | 59.905 | 8.9868 | 13.074 | 23.223 | 31.663 |
| R <sup>2</sup>                  | 0.7794                                      | 0.8712 | 0.8476 | 0.8151 | 0.7677  | 0.8278 | 0.9006 | 0.7882 | 0.8207 | 0.8481 | 0.9255 | 0.9896 |
